# Supplementary material for: Unexpected anion segregation enabling high conductivity in argyrodite Li 6− x PS 5− x ClBr x solid electrolytes
Source: Royal Society of Chemistry journal article supplement (doi:10.1039/d4ta06120a), 2024-01-01
Supplement: d4ta06120a1.pdf [file d4ta06120a1.pdf]

*Electronic Supplementary Information*

# Unexpected Anion Segregation Enabling High Conductivity in Argyrodite $\text{Li}_{6-x}\text{PS}_{5-x}\text{ClBr}_x$ Solid Electrolytes

Seho Yi,<sup>a,b,‡</sup> Taegon Jeon,<sup>b,‡</sup> Gyeong Ho Cha,<sup>b</sup> Young-Kyu Han,<sup>c,\*</sup> and Sung Chul Jung<sup>b,\*</sup>

<sup>a</sup>*Institute of Sustainable Earth and Environmental Dynamics (SEED), Pukyong National University, Busan 48547, Republic of Korea*

<sup>b</sup>*Department of Physics, Pukyong National University, Busan 48513, Republic of Korea*

<sup>c</sup>*Department of Energy and Materials Engineering and Advanced Energy and Electronic Materials Research Center, Dongguk University-Seoul, Seoul, 04620, Republic of Korea*

Corresponding Authors

\*E-mail: [ykenegy@dongguk.edu](mailto:ykenegy@dongguk.edu) and [scjung@pknu.ac.kr](mailto:scjung@pknu.ac.kr)

‡ Seho Yi and Taegon Jeon contributed equally to this work.

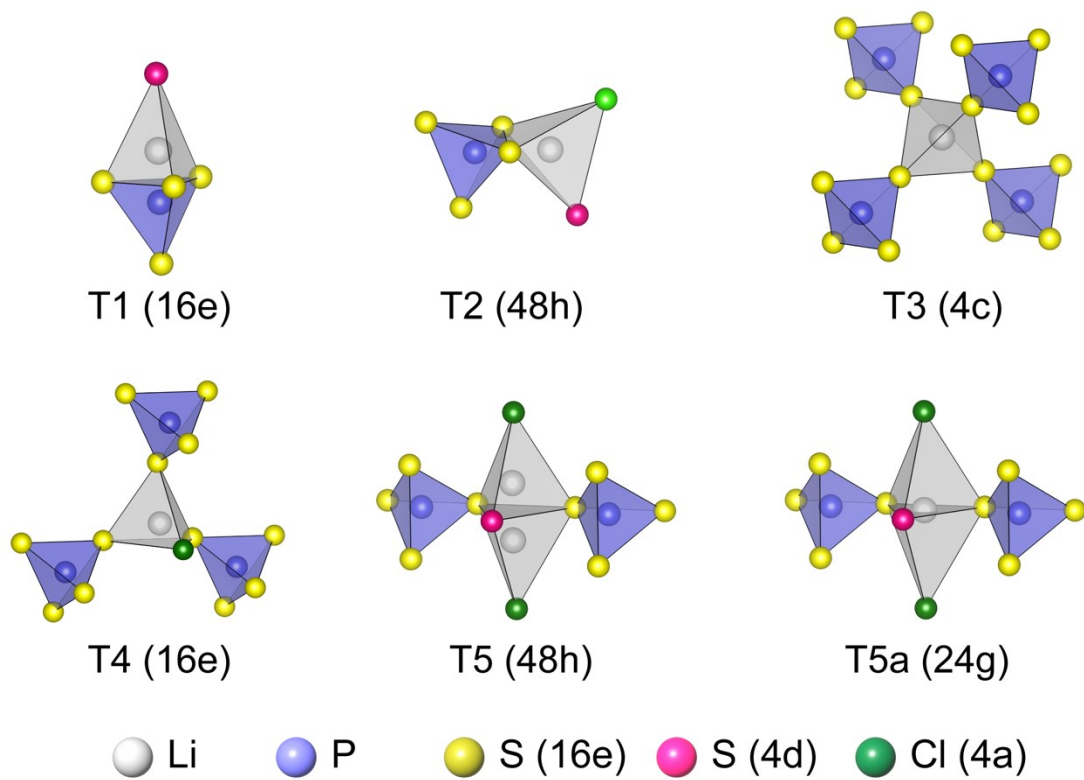

**Fig. S1** Five types of  $\text{LiS}_4/\text{LiS}_3\text{X}$  tetrahedra (grey) in  $\text{Li}_6\text{PS}_5\text{Cl}$ . They share the corners, edges, and faces of neighboring  $\text{PS}_4$  tetrahedra (violet) in different ways.

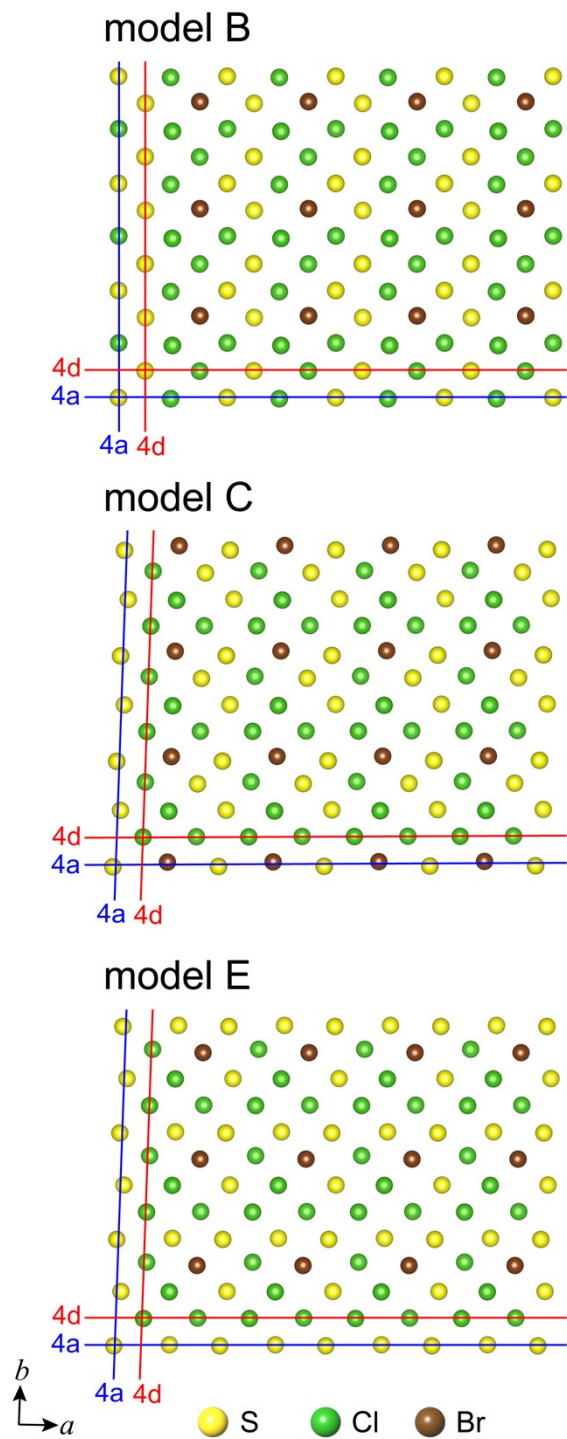

**Fig. S2** S, Cl, and Br anions at the 4a/4d sites of models B, C, and E in  $\text{Li}_{5.75}\text{PS}_{4.75}\text{ClBr}_{0.25}$ . Li cations and  $\text{PS}_4$  polyanions are not drawn for clarity.

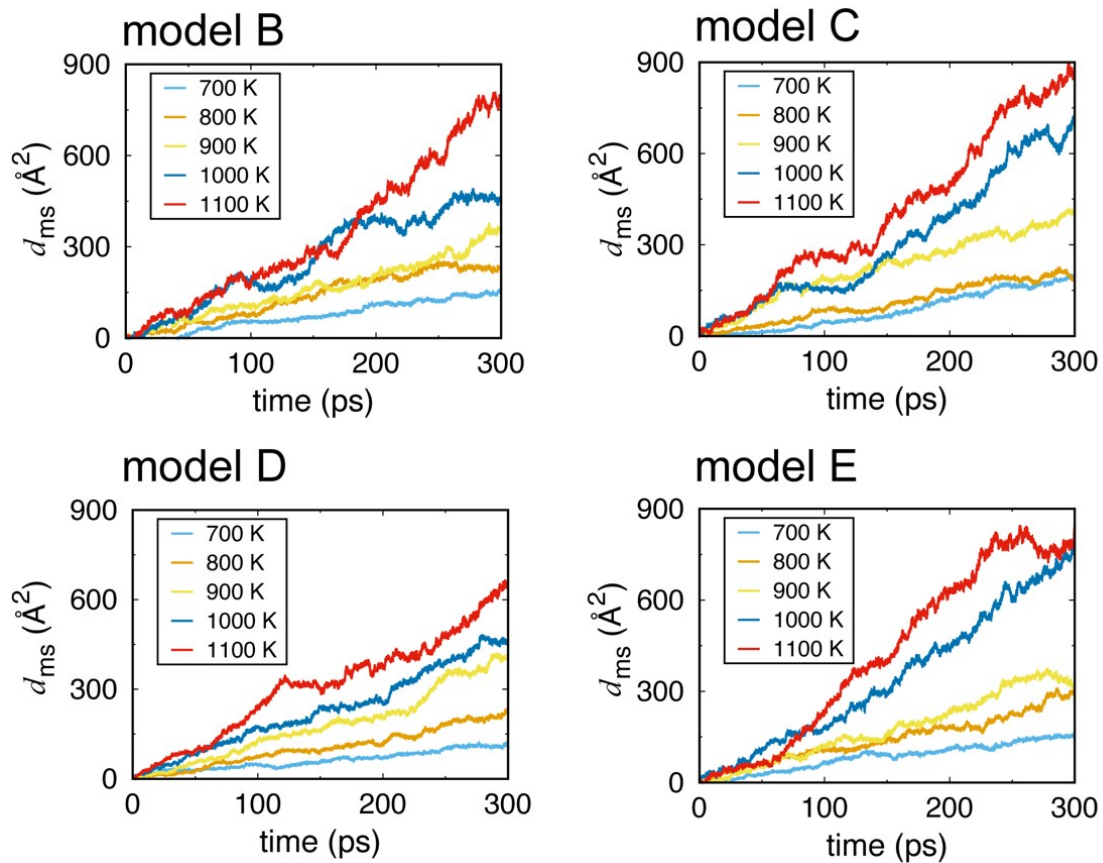

**Fig. S3** Mean-square displacements ( $d_{ms}$ ) of Li ions as a function of time for models B, C, D and E in  $\text{Li}_{5.75}\text{PS}_{4.75}\text{ClBr}_{0.25}$ .

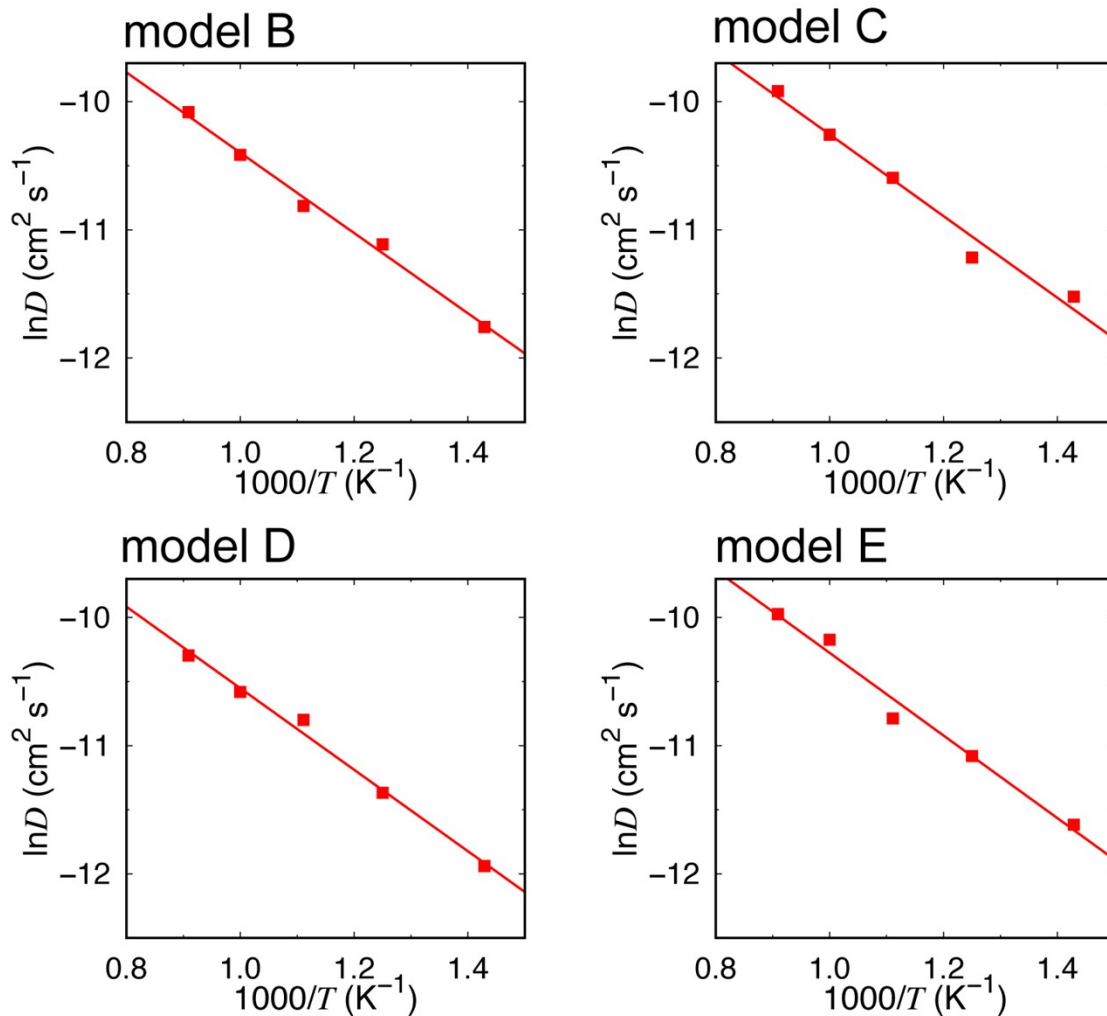

**Fig. S4** Logarithmic diffusivities ( $\ln D$ ) of Li ions as a function of inverse temperature for models B, C, D, and E in  $\text{Li}_{5.75}\text{PS}_{4.75}\text{ClBr}_{0.25}$ .

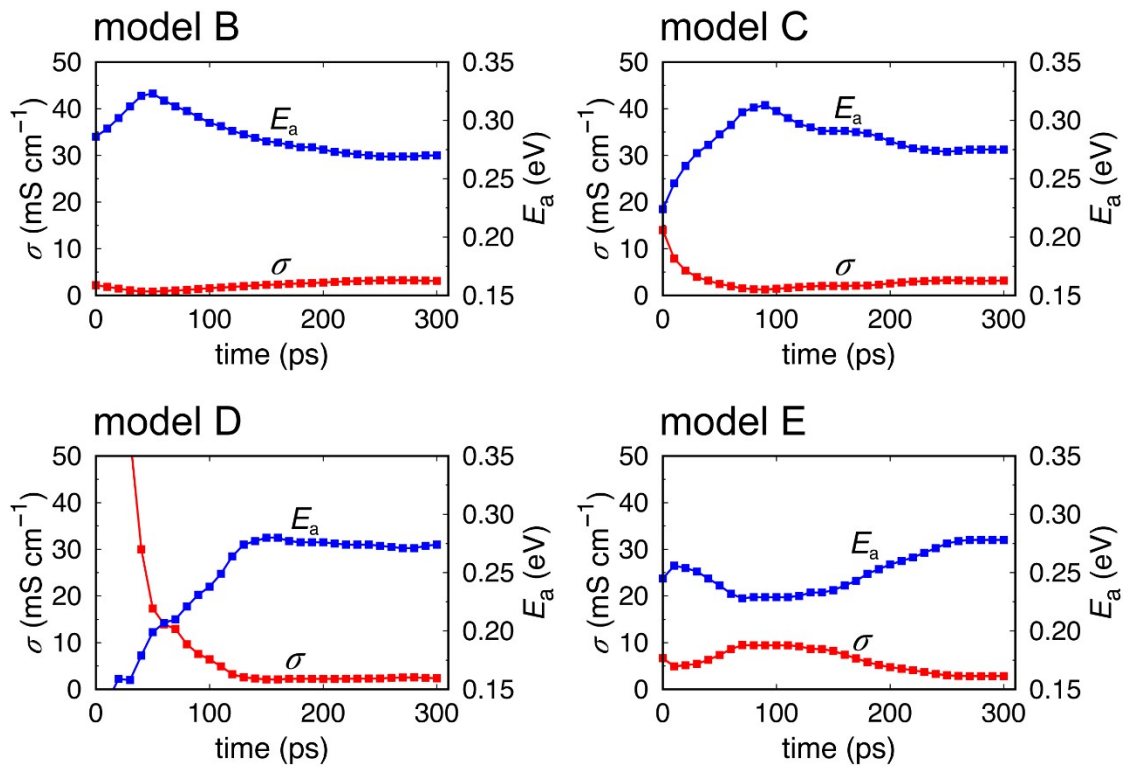

**Fig. S5** Conductivity ( $\sigma$ ) and activation energy ( $E_a$ ) as a function of time for models B, C, D and E in  $\text{Li}_{5.75}\text{PS}_{4.75}\text{ClBr}_{0.25}$ .

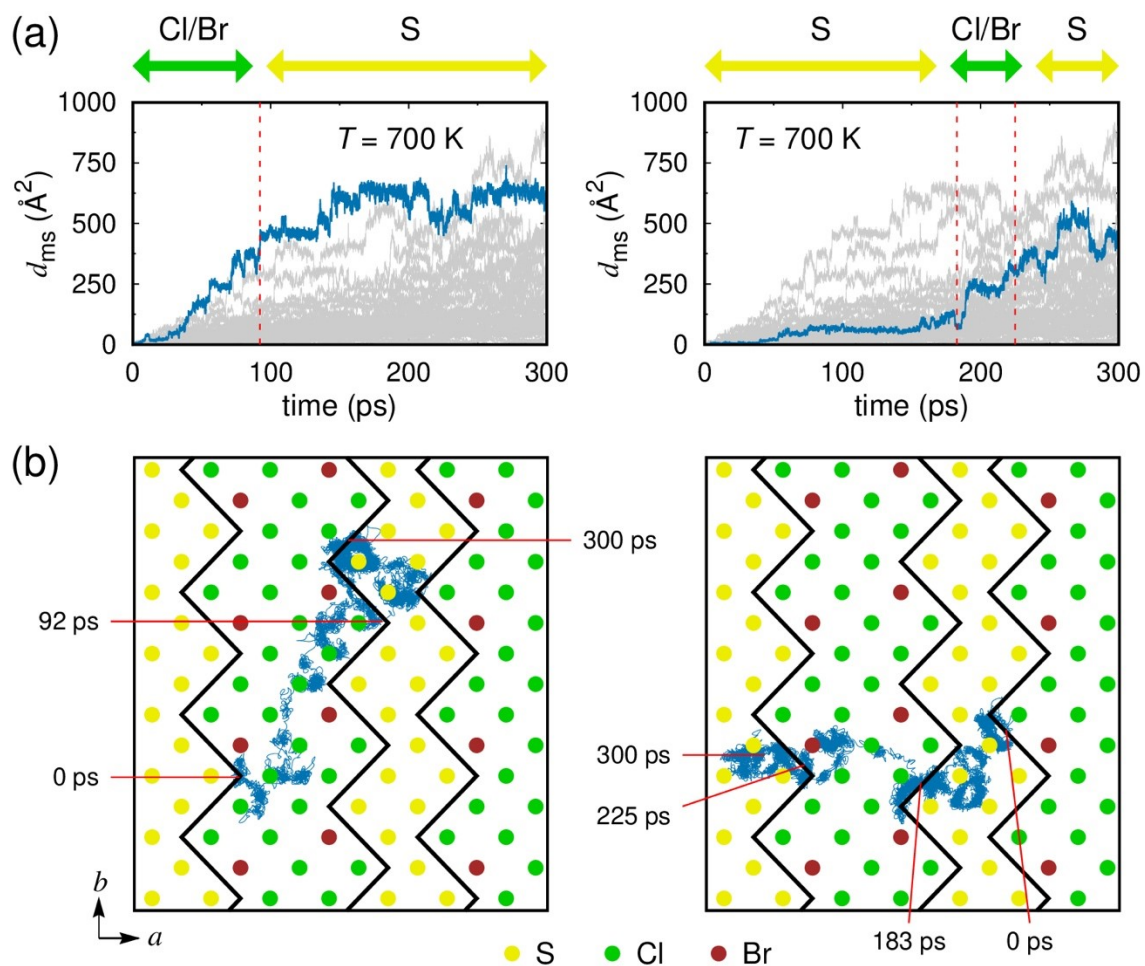

**Fig. S6** (a) Mean-square displacements ( $d_{\text{ms}}$ ) and (b) trajectories of two Li ions of model A in  $\text{Li}_{5.75}\text{PS}_{4.75}\text{ClBr}_{0.25}$ , obtained from the AIMD simulation for 300 ps at  $T = 700$  K.

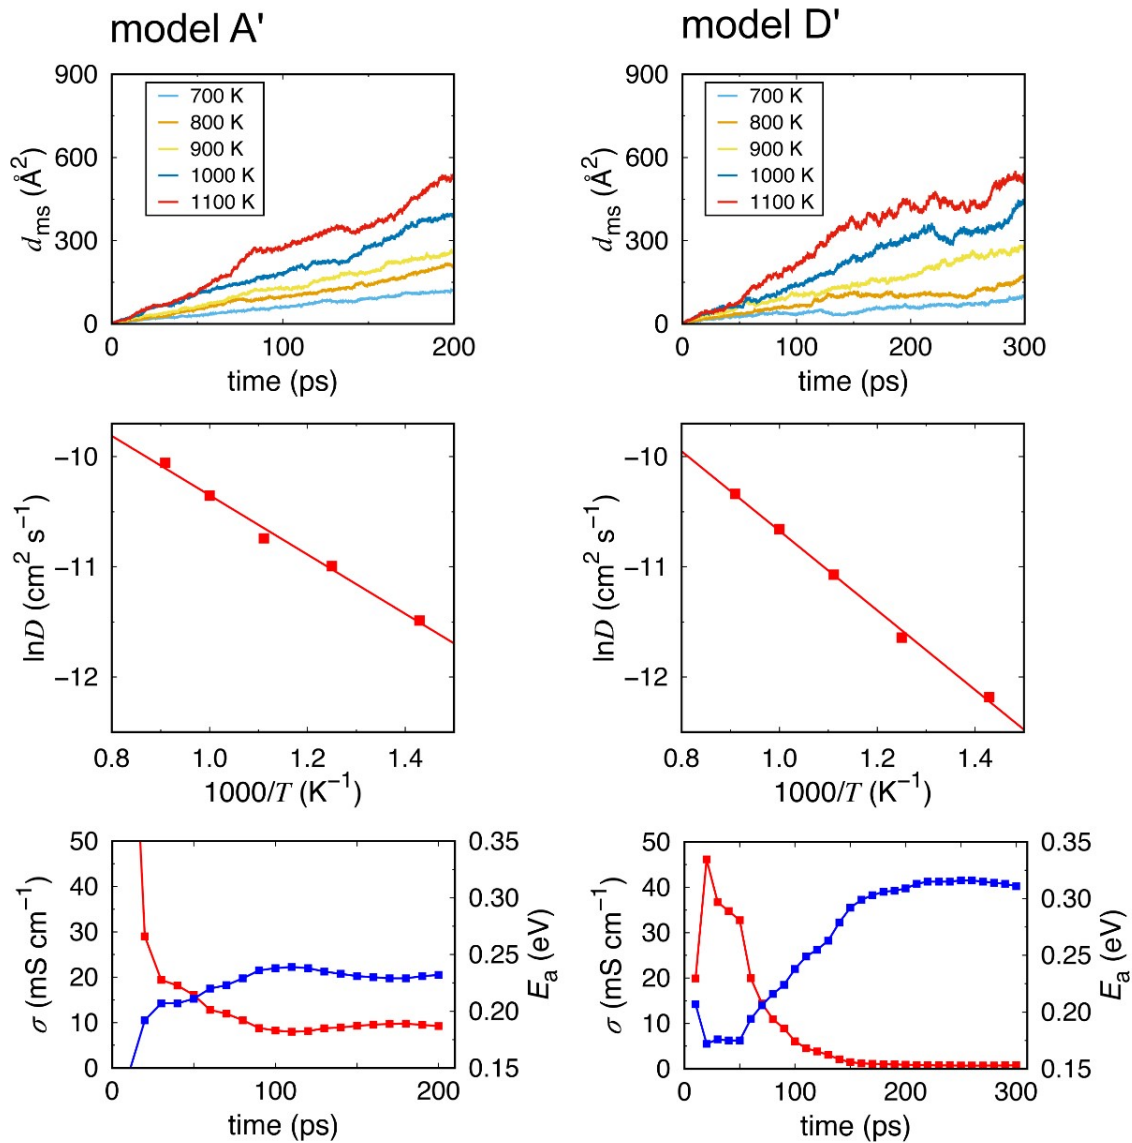

**Fig. S7** Mean-square displacements ( $d_{ms}$ ), logarithmic diffusivities ( $\ln D$ ), and conductivity ( $\sigma$ ) and activation energy ( $E_a$ ) of models A' and D' in  $\text{Li}_{5.75}\text{PS}_{4.75}\text{Cl}_{1.25}$ .



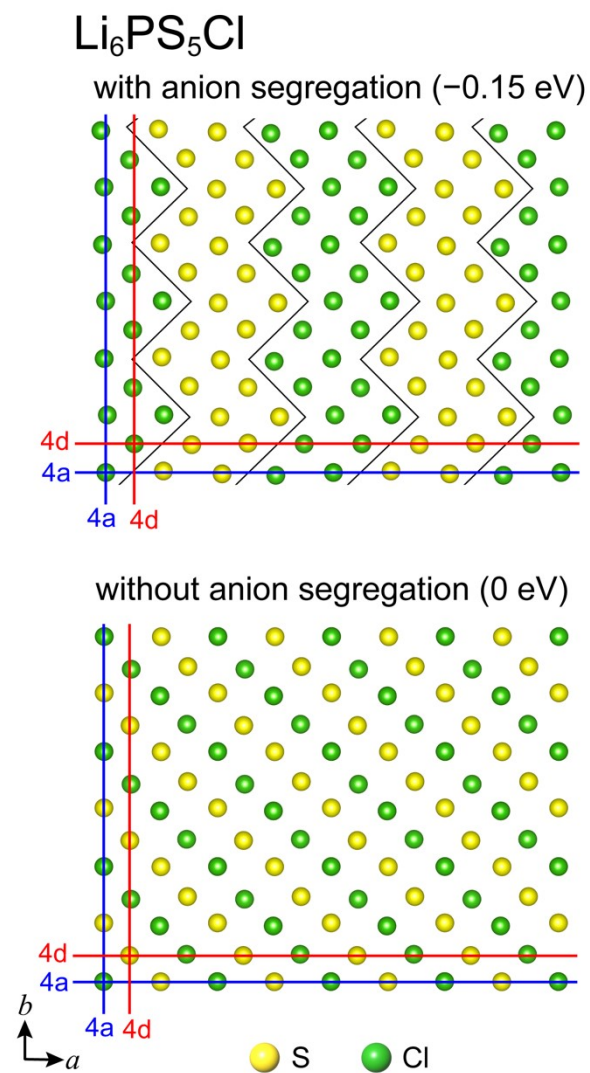

**Fig. S8** S and Cl anions at 4a/4d sites in two Li<sub>6</sub>PS<sub>5</sub>Cl structures with and without anion segregation. The Li<sub>6</sub>PS<sub>5</sub>Cl structure without anion segregation was obtained from ref. 1. Li cations and PS<sub>4</sub> polyanions are not drawn for clarity.

**Table S1** Lattice parameters of models A, B, C, D, and E in  $\text{Li}_{5.75}\text{PS}_{4.75}\text{ClBr}_{0.25}$ . The  $2 \times 1 \times 1$  tetragonal unit cell was used for model A, and the  $1 \times 1 \times 1$  cubic unit cell was used for models B, C, D, and E. Volumes are given per  $1 \times 1 \times 1$  unit cell.

| Model | $a$ (Å) | $b$ (Å) | $c$ (Å) | $\alpha$ (deg) | $\beta$ (deg) | $\gamma$ (deg) | Volume (Å <sup>3</sup> ) |
|-------|---------|---------|---------|----------------|---------------|----------------|--------------------------|
| A     | 19.49   | 9.81    | 9.74    | 90.8           | 90.2          | 90.9           | 930.5                    |
| B     | 9.82    | 9.70    | 9.69    | 89.5           | 90.6          | 89.9           | 923.3                    |
| C     | 9.73    | 9.73    | 9.80    | 90.8           | 90.0          | 87.7           | 926.6                    |
| D     | 9.95    | 9.66    | 9.73    | 90.1           | 90.7          | 90.8           | 934.6                    |
| E     | 9.78    | 9.84    | 9.71    | 90.7           | 90.0          | 88.4           | 933.5                    |

**Table S2** Diffusion properties of models A' and D' in  $\text{Li}_{5.75}\text{PS}_{4.75}\text{Cl}_{1.25}$ .  $D_0$  is the pre-exponential factor,  $D$  is the diffusivity at  $T = 300$  K,  $E_a$  is the activation energy, and  $\sigma$  is the conductivity at  $T = 300$  K.

| Model | $D_0$ ( $\text{cm}^2 \text{s}^{-1}$ ) | $D$ ( $\text{cm}^2 \text{s}^{-1}$ ) | $E_a$ (eV) | $\sigma$ ( $\text{mS cm}^{-1}$ ) |
|-------|---------------------------------------|-------------------------------------|------------|----------------------------------|
| A'    | $4.7 \times 10^{-4}$                  | $6.0 \times 10^{-8}$                | 0.23       | 9.2                              |
| D'    | $8.6 \times 10^{-4}$                  | $5.1 \times 10^{-9}$                | 0.31       | 0.8                              |

## References

- 1 T. Jeon, G. H. Cha and S. C. Jung, *J. Mater. Chem. A*, 2024, **12**, 993–1002.
